# Supplementary material for: Discovery of the Mafic Granulites in the Muzhaerte area, SW Tianshan, China
Source: Preprints.org preprint supplement (doi:10.20944/preprints202308.2067.v1), 2023-08-30
Supplement: Supplementary file 3 [file supplementary]

**Table S1.** The calculated results of the basic granulites in the Muzhaerte by the two-pyroxene thermobarometers.

| **Thermobarometers** | **Tmax (℃)** | **Tmin (℃)** | **Tave (℃)** |
| --- | --- | --- | --- |
| Wood version | 811 | 762 | 789 |
| Well version | 860 | 785 | 829 |
| Brey version | 632 | 533 | 590 |

**Table S2.** The calculated results of the basic granulites in the Muzhaerte by the Al-in-hornblende barometers.

| **Barometers** | **Pmax (kbar)** | **Pmin (kbar)** | **Pave (kbar)** |
| --- | --- | --- | --- |
| Anderson version | 4.1 | 3.9 | 4.0 |
| Hammarstrom version | 5.1 | 4.9 | 5.0 |
| Schmidt version | 5.5 | 5.3 | 5.4 |
